# Supplementary material for: Economically sustainable scaling of photovoltaics to meet climate targets
Source: Royal Society of Chemistry journal article supplement (doi:10.1039/c6ee00484a), 2016-01-01
Supplement: c6ee00484a4.xlsx [file c6ee00484a4.xlsx]

## Sheet: Sheet1
Sustainable Growth Rate Calculator
Supporting Online Materials from: David Berney Needleman, Jeremy R. Poindexter, Rachel C. Kurchin, I. Marius Peters, Gregory Wilson, and Tonio Buonassisi, "Economically Sustainable Scaling of Photovoltaics to Meet Climate Targets"
MIT Photovoltaic Research Laboratory — http://pv.mit.edu
	Inputs
	Operating Margin [%]	-22.9432
	PE&E0 Ratio [Upfront Capext-1/ Revenue]	1.14914
	Depreciation Period [yr]	7
	Working Capital [month]	12
	Tax Rate [%]	27.9
	Equity Portion of Capital	0.5
	Additional Debt available [1-yes,0-no]	1
	Debt Interest Rate [%]	0.046
	Pro Forma Balance Sheet
	Total capital needed in year 0 [$]
	WC [$]	106527
	Capex [$]	114914
	Sum [$]	221441
		End of Year 0	End of Year 1
	Equity [$]	110720	90506.1
	Debt [$]	110720	90506.1
	Total Capital [$]	221441	181012
	Pro Forma Income Statement
			During Year 1	During Year 2
	Revenue [$]		100000	81743
	COGS+OPEX [$]		106527	87078.4
	Depreciation [$]		16416.2	13419.1
	Operating Income (EBIT) [$]		-22943.2	-18754.5
	Interest Expense [$]		5093.14	4163.28
	Earnings before Taxes [$]		-28036.4	-22917.8
	Taxes [$]		-7822.15	-6394.06
	Net Income [$]		-20214.2	-16523.7
	Sustainable Growth Rate
	Constant Debt to Equity
	P, profit margin	-0.202142
	R, retention Ratio	1
	A, Asset Turnover	0.451588
	T, Leverage Factor for Additional Growth	2
	Sustainable Growth Rate (RPAT') [%]	-18.257
